# Supplementary material for: Fabricating an intelligent cell-like nano-prodrug via hierarchical self-assembly based on the DNA skeleton for suppressing lung metastasis of breast cancer
Source: Royal Society of Chemistry journal article supplement (doi:10.1039/c9bm00630c), 2019-01-01
Supplement: c9bm00630c1.pdf [file c9bm00630c1.pdf]

Supplementary Information for:

**Fabricating an intelligent cell-like nano-prodrug *via* the hierarchical self-assembly based on DNA skeleton for lung metastasis of breast cancer therapy†**

Yunyan Li,<sup>‡a</sup> Tong Yan,<sup>‡a</sup> Wenya Chang,<sup>b</sup> Chongjiang Cao<sup>\*,c</sup> and Dawei Deng<sup>\*,a,b</sup>

<sup>a</sup>Department of Biomedical Engineering, <sup>b</sup>Department of Pharmaceutical Engineering, and <sup>c</sup> National R&D Center for Chinese Herbal Medicine Processing, School of Engineering, China Pharmaceutical University, Nanjing 211198, P. R. China

<sup>‡</sup> These authors contributed equally to this work.

\* Corresponding authors.

Email: dengdawei@cpu.edu.cn (D. D), chongjiangcao@cpu.edu.cn (C. C.)

**Table S1.** DNA sequences used in this work.

| <b>Oligonucleotide</b> | <b>Sequences (from 5' to 3')</b>                                                                   |
|------------------------|----------------------------------------------------------------------------------------------------|
| <b>T<sub>0a</sub></b>  | CTG TCA TCG GTC AC ACA TTC CTA AGT CTG AAA CAT<br>TAC AGC TTG CTA CAC GAG AAG AGC CGC CAT AGT A    |
| <b>T<sub>0b</sub></b>  | CTG TCA TCG GTC AC TAT CAC CAG GCA GTT GAC AGT<br>GTA GCA AGC TGT AAT AGA TGC GAG GGT CCA ATA C    |
| <b>T<sub>0c</sub></b>  | CTG TCA TCG GTC AC TCA ACT GCC TGG TGA TAA AAC<br>GAC ACT ACG TGG GAA TCT ACT ATG GCG GCT CTT C    |
| <b>T<sub>0d</sub></b>  | CTG TCA TCG GTC AC TTC AGA CTT AGG AAT GTG CTT<br>CCC ACG TAG TGT CGT TTG TAT TGG ACC CTC GCA      |
| <b>T<sub>1a</sub></b>  | GAA GCC ACT CTG AT ACA TTC CTA AGT CTG AAA CAT<br>TAC AGC TTG CTA CAC GAG AAG AGC CGC CAT AGT A    |
| <b>T<sub>1b</sub></b>  | GTG ACC GAT GAC AG TAT CAC CAG GCA GTT GAC<br>AGT GTA GCA AGC TGT AAT AGA TGC GAG GGT CCA<br>ATA C |
| <b>T<sub>1c</sub></b>  | GAA GCC ACT CTG AT TCA ACT GCC TGG TGA TAA AAC<br>GAC ACT ACG TGG GAA TCT ACT ATG GCG GCT CTT C    |
| <b>T<sub>1d</sub></b>  | GAA GCC ACT CTG AT TTC AGA CTT AGG AAT GTG CTT<br>CCC ACG TAG TGT CGT TTG TAT TGG ACC CTC GCA T    |
| <b>T<sub>2a</sub></b>  | GAC CGA TGG ATG AG ACA TTC CTA AGT CTG AAA<br>CAT TAC AGC TTG CTA CAC GAG AAG AGC CGC CAT<br>AGT A |
| <b>T<sub>2b</sub></b>  | ATC AGA GTG GCT TC TAT CAC CAG GCA GTT GAC AGT<br>GTA GCA AGC TGT AAT AGA TGC GAG GGT CCA ATA C    |
| <b>T<sub>2c</sub></b>  | GAC CGA TGG ATG AG TCA ACT GCC TGG TGA TAA<br>AAC GAC ACT ACG TGG GAA TCT ACT ATG GCG GCT<br>CTT C |
| <b>T<sub>2d</sub></b>  | GAC CGA TGG ATG AG TTC AGA CTT AGG AAT GTG CTT<br>CCC ACG TAG TGT CGT TTG TAT TGG ACC CTC GCA T    |
| <b>SH-DNA</b>          | CTCATCCATCGGTC-C6-SH                                                                               |

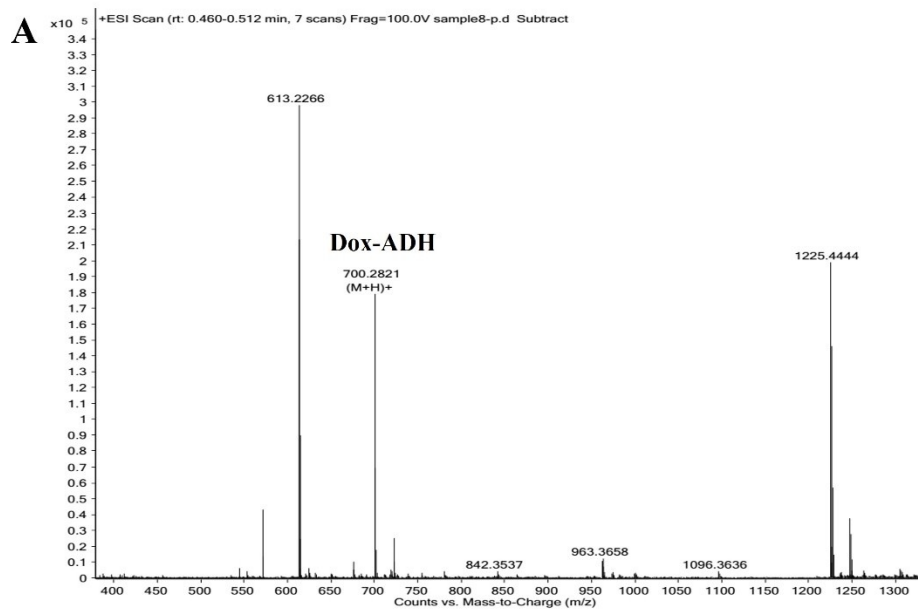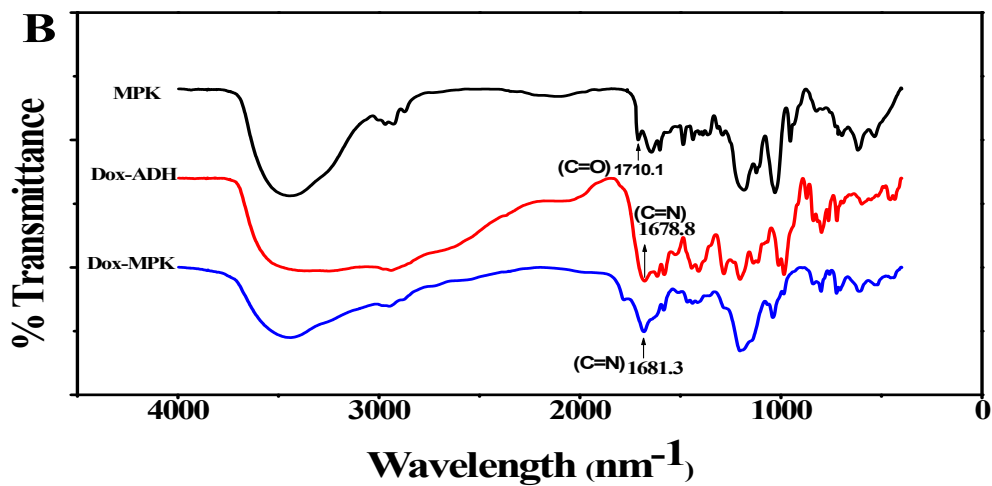

**Figure S1.** (A) The mass spectrum of Dox-ADH ( $m/z = 700$  [ $M+ +1$ ,  $\text{C}_{33}\text{H}_{41}\text{N}_5\text{O}_{12}$ ]). (B) FT-IR spectra of MPK, Dox-ADH, and Dox-MPK.

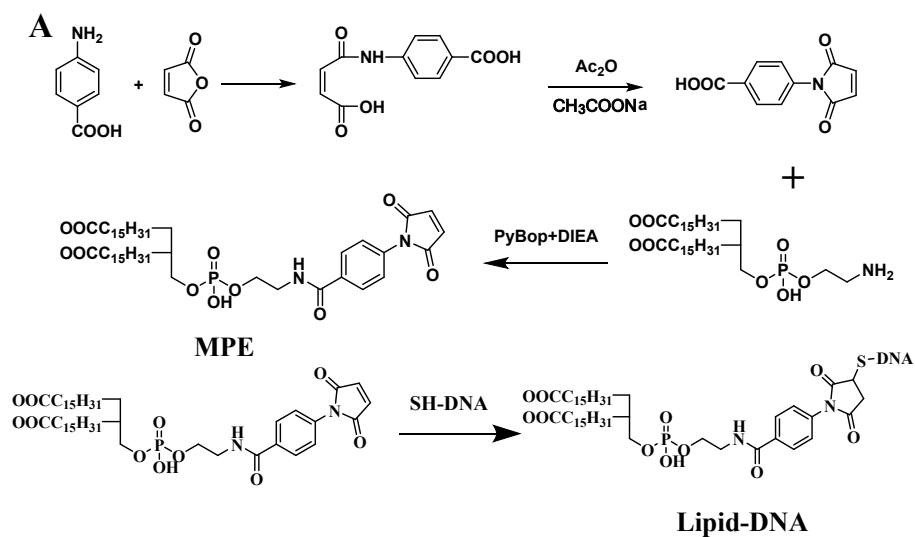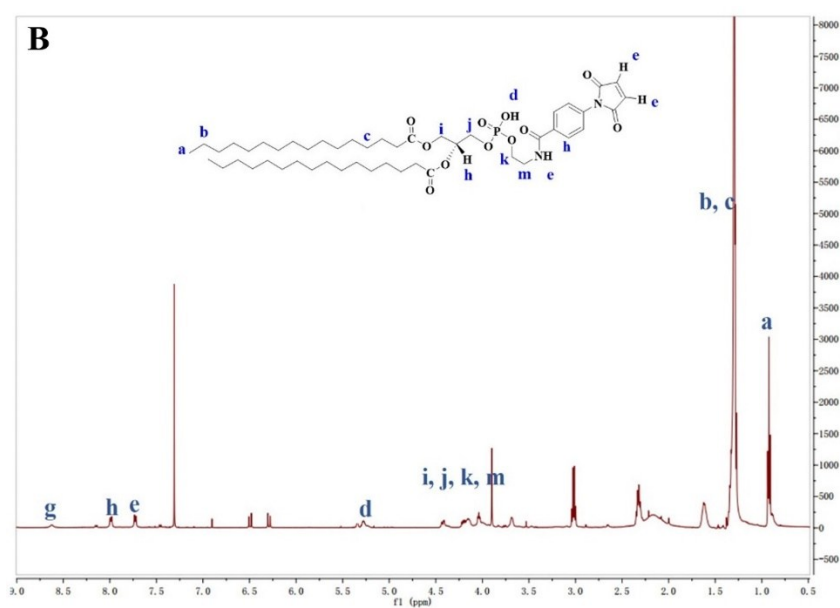

**Figure S2.** (A) The synthesis procedure of Lipid-DNA. (B) The  $^1\text{H}$ -NMR spectra of MPE.

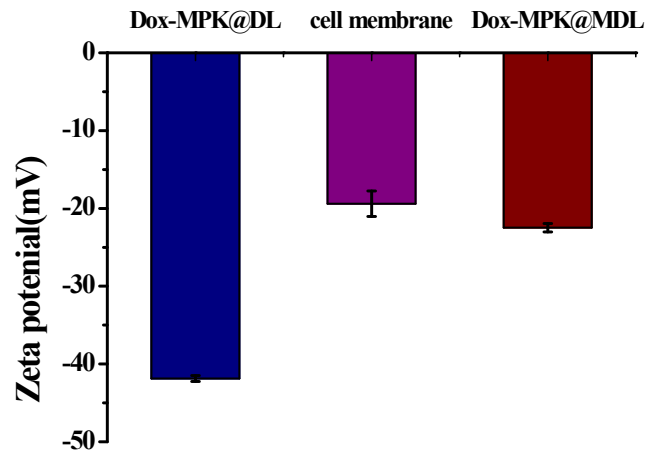

**Figure S3.** Surface charge of Dox-MPK@DL, macrophage membrane, and Dox-MPK@MDL, n=3.

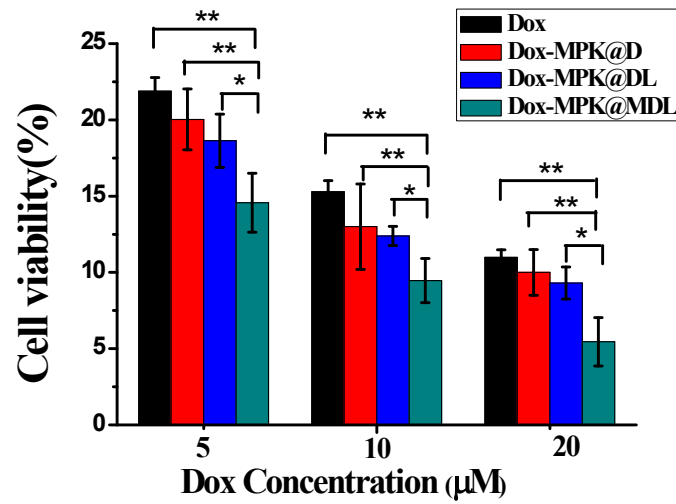

**Figure S4.** Cytotoxicity of each group at different concentrations of Dox, n=6, \*p < 0.05, \*\*p < 0.01

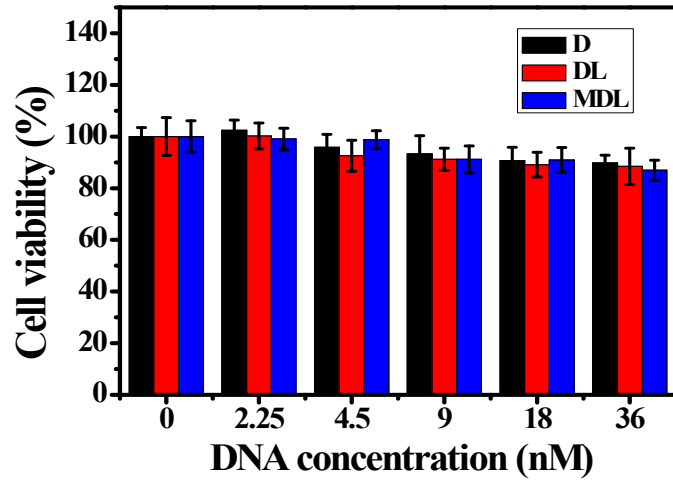

**Figure S5.** Cytotoxicity of blank D, DL and MDL without Dox in metastatic 4T1 cancer cells, n=6.

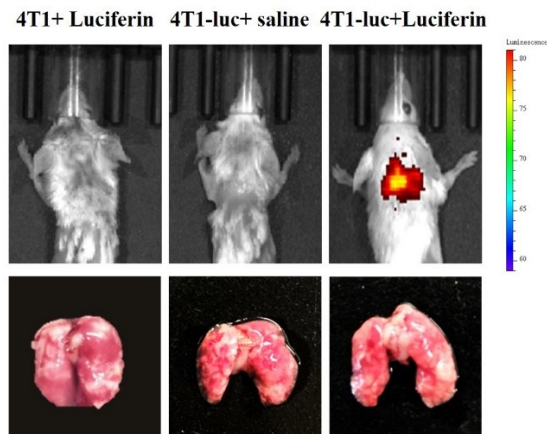

**Figure S6.** In vivo bioluminescence imaging of lung metastasis and photograph of lung lung tissues on the fourteenth day.

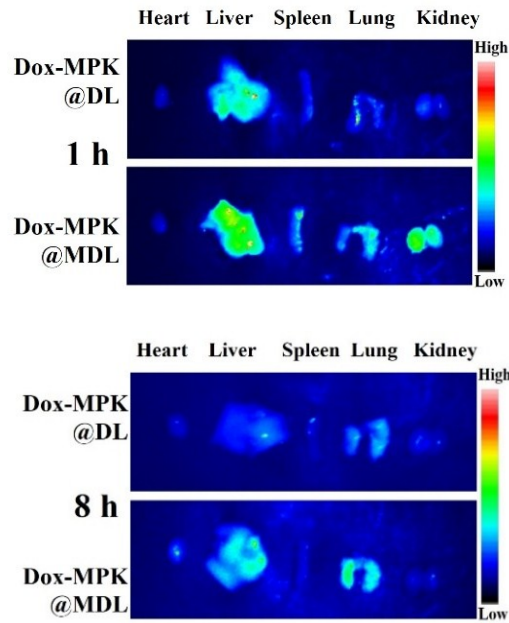

**Figure S7.** Corresponding ex vivo imaging of major organs at 1 h and 8 h post-injection.

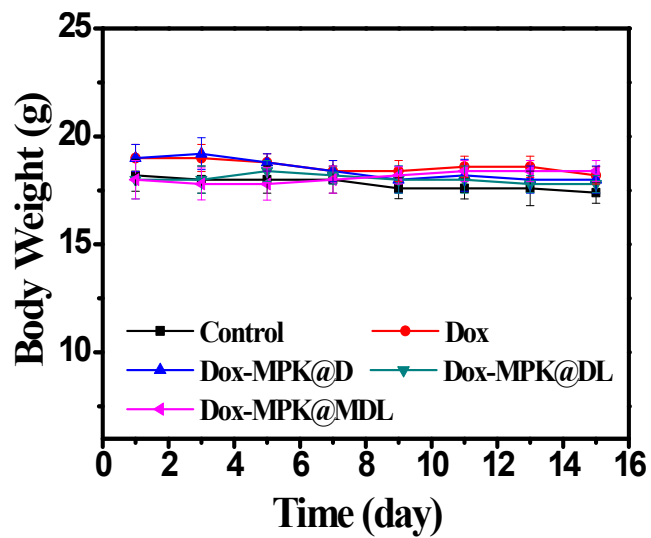

**Figure S8.** Body weight of each group of mice during the treatment period, n=5.

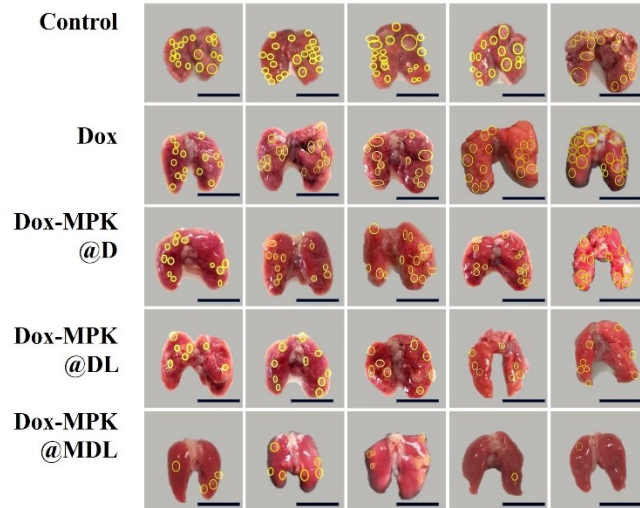

**Figure S9.** Typical photographs of lung tissues from each group, scale bar = 1 cm.

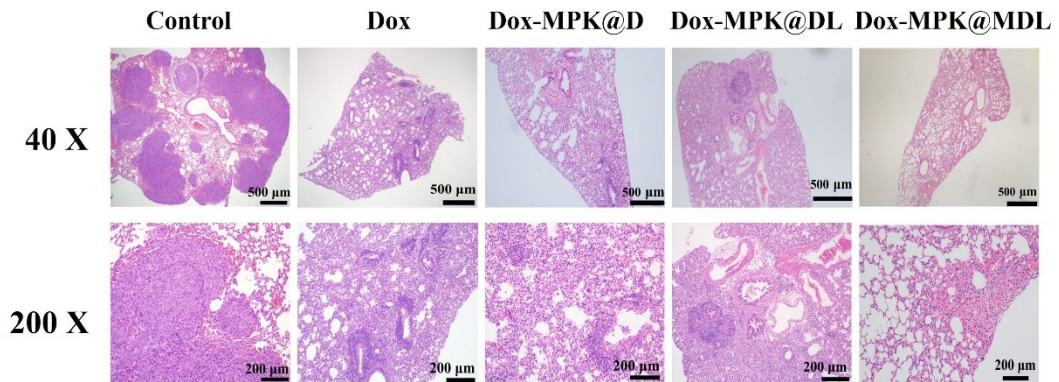

**Figure S10.** Histopathology sections of metastatic lesions in lung tissues from each group.
